# Supplementary material for: A ddRADseq Survey of the Genetic Diversity of Rye (Secale cereale L.) Landraces from the Western Alps Reveals the Progressive Reduction of the Local Gene Pool
Source: MDPI journal article supplement (doi:10.3390/plants10112415), 2021-11-09
Supplement: s1 [file s1]

*A ddRADseq survey of the genetic diversity of rye (*Secale cereale* L.) landraces from the Western Alps reveals the progressive reduction of the local gene pool.*

# Supplementary materials

Martino Adamo, Massimo Blandino, Luca Capo, Simone R. Enri, Anna Fusconi, Michele Lonati, Marco Mucciarelli

## 1. Supplementary Tables

**Table S1.** Evanno method results.

| K  | Reps | Mean LnP(K) | Stdev LnP(K) | Ln'(K)    | Ln''(K)  | Delta K |
|----|------|-------------|--------------|-----------|----------|---------|
| 1  | 10   | -1941440.46 | 380.510076   | NA        | NA       | NA      |
| 2  | 10   | -128345.000 | 2.339        | 15465.300 | 4423.940 | 81.389  |
| 3  | 10   | -124792.860 | 5.452        | 3552.140  | 1714.040 | 314.373 |
| 4  | 10   | -122954.760 | 271.332      | 1838.100  | 97.720   | 0.360   |
| 5  | 10   | -121018.940 | 407.545      | 1935.820  | 118.640  | 0.291   |
| 6  | 10   | -119201.760 | 43.523       | 1817.180  | 1107.370 | 25.444  |
| 7  | 10   | -118491.950 | 1236.175     | 709.810   | 562.160  | 0.455   |
| 8  | 10   | -117219.980 | 323.733      | 1271.970  | 600.870  | 1.856   |
| 9  | 10   | -116548.880 | 251.563      | 671.100   | 131.370  | 0.522   |
| 10 | 10   | -115746.410 | 79.609       | 802.470   | 131.623  | 1.653   |
| 11 | 8    | -115075.563 | 106.352      | 670.848   | NA       | NA      |

## 2. Supplementary Figures

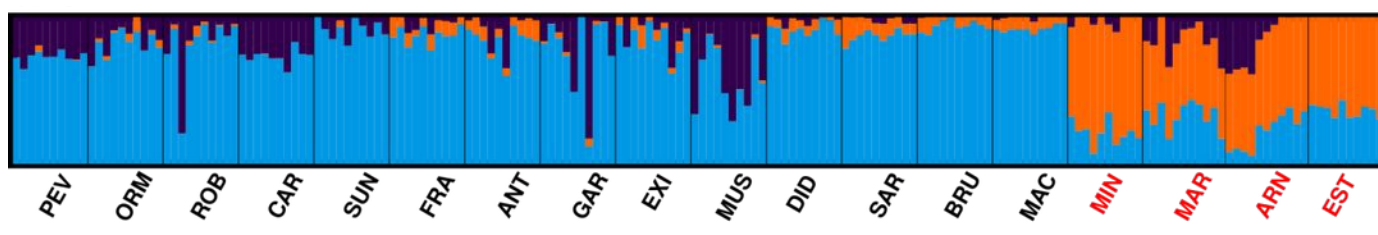

**Figure S1.** Structure output for K = 3. Interpretation of the STRUCTURE results with Evanno method (Evanno et al., 2005) for the most likely K = 3. Rye samples are separated in three main genetic clusters. Accessions are statistically assigned to two main groups; cluster I (black IDs) and cluster II (red IDs).

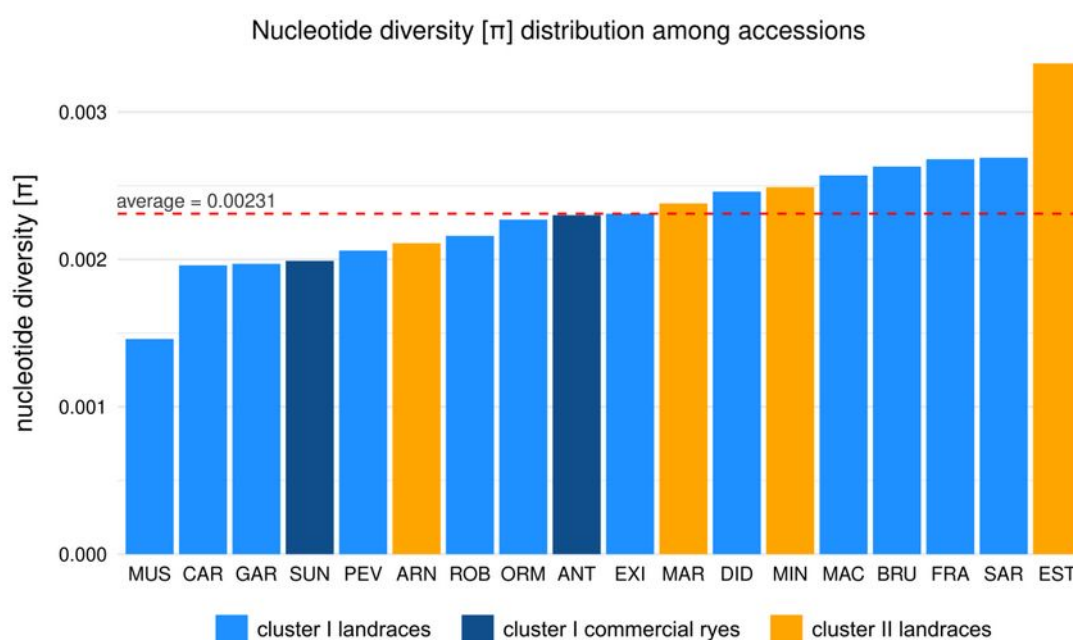

**Figure S2.** Nucleotide diversity ( $\pi$ ) distribution among rye accessions. Populations are ordered by the ascending value of  $\pi$ . Bright and dark blue bars are for accessions belonging to cluster I, orange bars are for accessions belonging to cluster II. Dark blue differentiate commercial rye accessions from landraces in cluster I. Red dashed line corresponds to the average  $\pi$ .

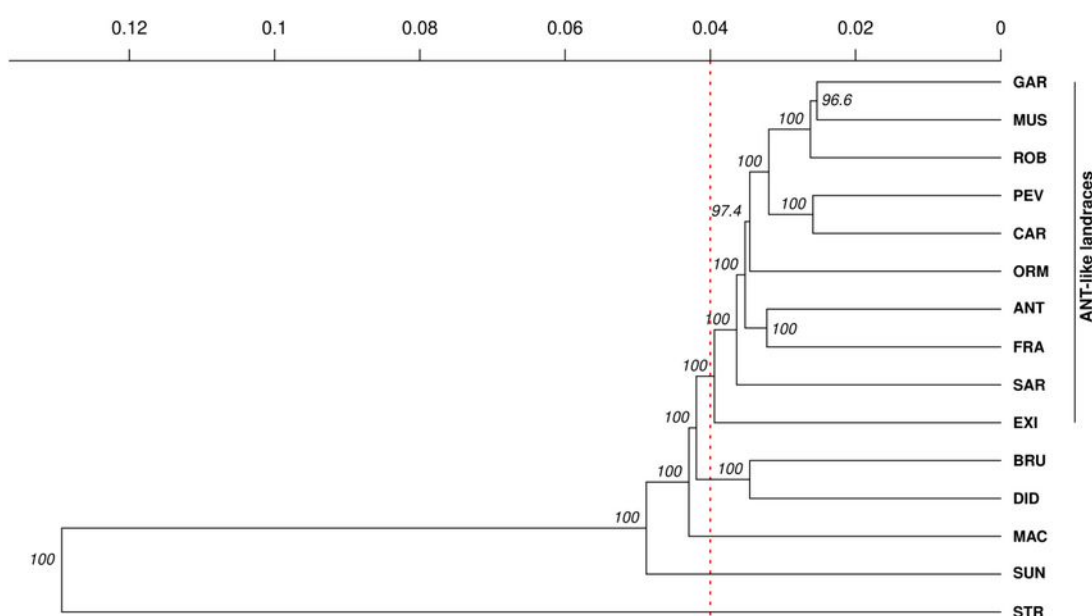

**Figure S3.** Neighbour joining tree based on Prevosti's genetic distances between accessions from cluster I. Populations are those from the cluster I in Structure, with the addition of *S. strictum* as outgroup. We selected 0.04 as a threshold (dashed red line) to inspect genetic relationships within the larger genetic cluster of rye landraces and the two modern varieties. Topology is nj-based and bootstrap values are reported only when higher than 75.
